# Supplementary material for: Altered brain functional connectivity in vegetative state and minimally conscious state
Source: Front Aging Neurosci. 2023 Jun 29;15:1213904. doi: 10.3389/fnagi.2023.1213904 (PMC10352323; doi:10.3389/fnagi.2023.1213904)
Supplement: Supplementary file 2 [file Table_2.XLSX]

## Sheet: Sheet1
Between-group differences in nodal efficiency
	NC&MCS	NC&VS	MCS&VS
PreCG.L		↓	↓
PreCG.R	↓	↓			The details of between-group comparisons for each local network measure are shown in the following tables.
SFGdor.L	↓				Decreased local network measurements in each brain area (MCS group < NC group, VS group < NC group, and VS group < MCS group) are marked with ↓.
SFGdor.R	↓	↓			Increased local network measurements in each brain area (MCS group > NC group, VS group > NC group, and VS group > MCS group) are marked with ↑.
ORBsup.L	↓	↓			Blank in the table indicates there is no significant between-group differences in local network measures of the brain area.
ORBsup.R	↓	↓			Each brain area is labeled with its name abbreviation of the AAL brain template.
MFG.L
MFG.R	↓		↑
ORBmid.L
ORBmid.R
IFGoperc.L	↓	↓
IFGoperc.R	↓	↓
IFGtriang.L	↓
IFGtriang.R	↓	↓
ORBinf.L	↓	↓
ORBinf.R	↓	↓
ROL.L	↓	↓
ROL.R	↓	↓
SMA.L	↓	↓
SMA.R	↓	↓
OLF.L
OLF.R
SFGmed.L	↓
SFGmed.R	↓	↓
ORBsupmed.L	↓	↓
ORBsupmed.R	↓	↓
REC.L	↓	↓
REC.R	↓	↓
INS.L		↓
INS.R	↓	↓
ACG.L	↓	↓
ACG.R	↓	↓
DCG.L	↓	↓
DCG.R	↓	↓
PCG.L	↓	↓
PCG.R	↓	↓
HIP.L
HIP.R
PHG.L	↓	↓
PHG.R	↓	↓
AMYG.L	↓	↓
AMYG.R	↓	↓
CAL.L	↓	↓
CAL.R	↓	↓
CUN.L
CUN.R		↓
LING.L	↓	↓
LING.R	↓	↓
SOG.L		↓
SOG.R		↓
MOG.L	↓	↓
MOG.R
IOG.L		↓
IOG.R		↓
FFG.L	↓	↓
FFG.R	↓	↓
PoCG.L	↓	↓	↓
PoCG.R	↓	↓
SPG.L
SPG.R
IPL.L	↓	↓
IPL.R	↓
SMG.L		↓	↓
SMG.R	↓	↓
ANG.L	↓	↓
ANG.R
PCUN.L		↓
PCUN.R		↓
PCL.L		↓
PCL.R		↓	↓
CAU.L		↑
CAU.R		↑	↑
PUT.L
PUT.R
PAL.L	↓
PAL.R
THA.L
THA.R
HES.L	↓	↓	↓
HES.R	↓	↓
STG.L	↓	↓
STG.R	↓	↓
TPOsup.L	↓	↓
TPOsup.R	↓	↓
MTG.L	↓	↓
MTG.R	↓	↓
TPOmid.L
TPOmid.R
ITG.L	↓	↓
ITG.R	↓	↓

## Sheet: Sheet2
Between-group differences in nodal local efficiency
	NC&MCS	NC&VS	MCS&VS
PreCG.L
PreCG.R	↓	↓
SFGdor.L
SFGdor.R	↓	↓
ORBsup.L	↓	↓
ORBsup.R	↓	↓
MFG.L
MFG.R	↓
ORBmid.L		↓
ORBmid.R	↓	↓
IFGoperc.L	↓	↓
IFGoperc.R	↓	↓
IFGtriang.L	↓	↓
IFGtriang.R	↓
ORBinf.L		↓
ORBinf.R	↓	↓
ROL.L		↓	↓
ROL.R	↓	↓
SMA.L
SMA.R
OLF.L
OLF.R
SFGmed.L	↓	↓
SFGmed.R	↓	↓
ORBsupmed.L	↓	↓
ORBsupmed.R	↓	↓
REC.L		↓
REC.R	↓	↓
INS.L	↓	↓
INS.R	↓	↓
ACG.L	↓	↓
ACG.R	↓	↓
DCG.L	↓	↓
DCG.R	↓	↓
PCG.L	↓	↓
PCG.R	↓	↓
HIP.L
HIP.R
PHG.L		↓
PHG.R	↓
AMYG.L	↓	↓
AMYG.R	↓
CAL.L	↓	↓
CAL.R	↓	↓
CUN.L		↓
CUN.R		↓
LING.L	↓	↓
LING.R	↓	↓
SOG.L	↓
SOG.R		↓
MOG.L
MOG.R		↓
IOG.L
IOG.R		↓
FFG.L	↓
FFG.R	↓	↓
PoCG.L		↓
PoCG.R	↓	↓
SPG.L
SPG.R
IPL.L		↓
IPL.R		↓
SMG.L		↓	↓
SMG.R	↓	↓
ANG.L		↓
ANG.R	↓	↓
PCUN.L	↓	↓
PCUN.R	↓	↓
PCL.L		↓
PCL.R
CAU.L		↑	↑
CAU.R		↑
PUT.L
PUT.R	↓	↓
PAL.L	↓	↓
PAL.R	↓	↓
THA.L
THA.R
HES.L	↓	↓
HES.R	↓	↓
STG.L	↓	↓
STG.R	↓	↓
TPOsup.L	↓	↓
TPOsup.R	↓	↓
MTG.L
MTG.R	↓	↓
TPOmid.L
TPOmid.R
ITG.L
ITG.R

## Sheet: Sheet3
Between-group differences in nodal clustering coefficient
	NC&MCS	NC&VS	MCS&VS
PreCG.L
PreCG.R	↓	↓
SFGdor.L
SFGdor.R	↓	↓
ORBsup.L		↓
ORBsup.R	↓
MFG.L
MFG.R
ORBmid.L		↓
ORBmid.R	↓
IFGoperc.L	↓	↓
IFGoperc.R		↓
IFGtriang.L		↓
IFGtriang.R	↓
ORBinf.L
ORBinf.R	↓
ROL.L		↓	↓
ROL.R	↓	↓
SMA.L
SMA.R
OLF.L
OLF.R
SFGmed.L	↓
SFGmed.R	↓	↓
ORBsupmed.L	↓	↓
ORBsupmed.R	↓	↓
REC.L		↓
REC.R	↓	↓
INS.L	↓	↓
INS.R	↓	↓
ACG.L	↓	↓
ACG.R	↓	↓
DCG.L
DCG.R	↓
PCG.L	↓	↓
PCG.R	↓	↓
HIP.L
HIP.R
PHG.L
PHG.R	↓
AMYG.L	↓	↓
AMYG.R	↓
CAL.L	↓	↓
CAL.R	↓	↓
CUN.L		↓
CUN.R		↓
LING.L	↓	↓
LING.R	↓	↓
SOG.L	↓
SOG.R
MOG.L
MOG.R		↓
IOG.L
IOG.R	↓	↓
FFG.L	↓
FFG.R	↓
PoCG.L		↓
PoCG.R	↓	↓
SPG.L
SPG.R
IPL.L
IPL.R		↓
SMG.L		↓
SMG.R	↓	↓
ANG.L		↓
ANG.R	↓	↓
PCUN.L	↓	↓
PCUN.R	↓
PCL.L
PCL.R
CAU.L		↑	↑
CAU.R		↑
PUT.L
PUT.R	↓	↓
PAL.L	↓	↓
PAL.R	↓	↓
THA.L
THA.R
HES.L	↓	↓
HES.R	↓	↓
STG.L	↓	↓
STG.R	↓	↓
TPOsup.L		↓
TPOsup.R	↓	↓
MTG.L
MTG.R	↓
TPOmid.L	↓	↓
TPOmid.R
ITG.L
ITG.R

## Sheet: Sheet4
Between-group differences in degree centrality
	NC&MCS	NC&VS	MCS&VS
PreCG.L		↓	↓
PreCG.R		↓
SFGdor.L
SFGdor.R	↓		↑
ORBsup.L		↓
ORBsup.R
MFG.L
MFG.R	↓	↑	↑
ORBmid.L
ORBmid.R
IFGoperc.L
IFGoperc.R	↓
IFGtriang.L
IFGtriang.R
ORBinf.L
ORBinf.R	↓
ROL.L		↓
ROL.R	↓	↓
SMA.L
SMA.R	↓	↓
OLF.L	↑
OLF.R
SFGmed.L
SFGmed.R
ORBsupmed.L	↓	↓
ORBsupmed.R	↓	↓
REC.L
REC.R	↓	↓
INS.L
INS.R	↓
ACG.L	↓	↓
ACG.R	↓	↓
DCG.L	↓	↓
DCG.R	↓	↓
PCG.L
PCG.R
HIP.L
HIP.R
PHG.L	↓	↓
PHG.R	↓	↓
AMYG.L	↓	↓
AMYG.R	↓
CAL.L
CAL.R	↓	↓
CUN.L
CUN.R
LING.L	↓	↓
LING.R	↓	↓
SOG.L
SOG.R		↓
MOG.L
MOG.R
IOG.L
IOG.R
FFG.L
FFG.R	↓	↓
PoCG.L		↓	↓
PoCG.R		↓
SPG.L
SPG.R
IPL.L
IPL.R
SMG.L			↓
SMG.R
ANG.L
ANG.R
PCUN.L
PCUN.R
PCL.L
PCL.R		↓	↓
CAU.L		↑
CAU.R		↑	↑
PUT.L
PUT.R
PAL.L
PAL.R
THA.L	↑	↑
THA.R
HES.L	↓	↓	↓
HES.R	↓	↓
STG.L	↓	↓
STG.R	↓	↓
TPOsup.L		↓
TPOsup.R		↓
MTG.L	↓	↓
MTG.R
TPOmid.L
TPOmid.R
ITG.L
ITG.R	↓	↓

## Sheet: Sheet5
Between-group differences in betweenness centrality
	NC&MCS	NC&VS	MCS&VS
PreCG.L
PreCG.R
SFGdor.L
SFGdor.R		↑	↑
ORBsup.L
ORBsup.R
MFG.L
MFG.R		↑	↑
ORBmid.L		↑
ORBmid.R	↑	↑
IFGoperc.L
IFGoperc.R
IFGtriang.L
IFGtriang.R		↑
ORBinf.L	↓		↑
ORBinf.R
ROL.L
ROL.R			↓
SMA.L
SMA.R	↓
OLF.L	↑		↓
OLF.R			↓
SFGmed.L	↑	↑
SFGmed.R	↑	↑
ORBsupmed.L
ORBsupmed.R
REC.L		↑
REC.R
INS.L	↑	↑
INS.R	↑
ACG.L	↓	↓
ACG.R
DCG.L	↓	↓
DCG.R
PCG.L
PCG.R	↑		↓
HIP.L			↓
HIP.R	↑	↑	↓
PHG.L		↓
PHG.R		↓	↓
AMYG.L
AMYG.R
CAL.L
CAL.R
CUN.L		↑	↑
CUN.R		↑
LING.L
LING.R
SOG.L
SOG.R
MOG.L
MOG.R		↑
IOG.L		↓
IOG.R
FFG.L
FFG.R
PoCG.L		↓
PoCG.R		↑
SPG.L	↑	↑
SPG.R	↑	↑
IPL.L
IPL.R		↑
SMG.L
SMG.R
ANG.L			↑
ANG.R		↑	↑
PCUN.L	↑	↑
PCUN.R	↑	↑
PCL.L
PCL.R
CAU.L
CAU.R
PUT.L		↓
PUT.R			↓
PAL.L
PAL.R
THA.L	↑	↑
THA.R
HES.L
HES.R
STG.L	↓	↓
STG.R
TPOsup.L
TPOsup.R
MTG.L	↓	↓
MTG.R
TPOmid.L		↑
TPOmid.R		↓	↓
ITG.L	↑	↑
ITG.R	↓	↓	↑

## Sheet: Sheet6
Between-group differences in eigenvector centrality
	NC&MCS	NC&VS	MCS&VS
PreCG.L	↑	↓	↓
PreCG.R		↓
SFGdor.L		↑
SFGdor.R	↓		↑
ORBsup.L
ORBsup.R
MFG.L	↑	↑
MFG.R		↑	↑
ORBmid.L	↑	↑
ORBmid.R		↑
IFGoperc.L
IFGoperc.R
IFGtriang.L	↑	↑
IFGtriang.R
ORBinf.L
ORBinf.R
ROL.L		↓
ROL.R		↓
SMA.L
SMA.R	↓	↓
OLF.L	↑	↑
OLF.R
SFGmed.L		↑
SFGmed.R		↑
ORBsupmed.L
ORBsupmed.R
REC.L
REC.R
INS.L
INS.R
ACG.L	↓
ACG.R	↓
DCG.L	↓	↓
DCG.R	↓	↓
PCG.L
PCG.R		↑
HIP.L
HIP.R
PHG.L		↓
PHG.R
AMYG.L
AMYG.R	↓
CAL.L
CAL.R		↓
CUN.L		↑
CUN.R
LING.L	↓
LING.R		↓
SOG.L
SOG.R
MOG.L
MOG.R
IOG.L
IOG.R
FFG.L
FFG.R
PoCG.L		↓	↓
PoCG.R		↓
SPG.L	↑
SPG.R		↑
IPL.L
IPL.R
SMG.L
SMG.R
ANG.L		↑
ANG.R		↑
PCUN.L	↑
PCUN.R	↑
PCL.L
PCL.R		↓
CAU.L	↑	↑
CAU.R		↑	↑
PUT.L
PUT.R
PAL.L
PAL.R
THA.L	↑	↑
THA.R
HES.L		↓
HES.R	↓	↓
STG.L		↓
STG.R	↓	↓
TPOsup.L		↓
TPOsup.R
MTG.L
MTG.R
TPOmid.L
TPOmid.R
ITG.L
ITG.R	↓
