# Supplementary material for: Altered brain functional connectivity in vegetative state and minimally conscious state
Source: Front Aging Neurosci. 2023 Jun 29;15:1213904. doi: 10.3389/fnagi.2023.1213904 (PMC10352323; doi:10.3389/fnagi.2023.1213904)
Supplement: Supplementary file 3 [file Table_3.XLSX]

## Sheet: Sheet1
Subject ID	Diagnose	The quality of the coregistration	max(abs(Tx))	max(abs(Ty))	max(abs(Tz))	max(abs(Rx))	max(abs(Ry))	max(abs(Rz))
1	MCS		0.671538	1.17359	1.50166	1.05458	0.682192	2.41509
2	MCS		0.439038	0.245566	1.09953	0.654473	0.882854	0.898293
3	MCS		1.57975	1.96741	0.691281	1.07573	1.65393	2.39687
4	MCS	O	3.0116	2.87757	6.69252	3.94267	7.43936	9.22615
5	MCS		0.235384	0.172219	1.43972	0.408409	1.38834	0.672838
6	MCS		0.253965	0.195949	1.1492	1.34155	0.795357	1.30866
7	MCS		0.0502402	0.0840985	0.327732	0.193605	0.134974	0.142217
8	MCS		0.989123	1.12914	2.53889	2.78926	0.903943	1.87845
9	MCS	O	0.744778	0.254159	1.52548	1.16817	1.42919	0.46402
10	MCS		0.60434	0.360077	1.45848	1.01925	1.32253	0.99028
11	MCS		1.99853	1.27624	1.46852	0.871443	1.66844	0.929828
12	MCS	O	0.317901	0.164339	0.526627	0.340103	0.34265	0.291334
13	MCS		0.322462	0.320973	2.1673	2.05708	1.67983	1.88679
14	MCS		0.126353	0.847418	0.722122	0.437291	0.0844402	0.0941266
15	MCS		0.657643	0.398434	0.790636	0.593138	1.6607	2.30979
16	MCS		0.0670941	0.480926	0.568474	0.787094	1.29056	1.01265
17	MCS		0.308682	0.283446	1.92119	0.41489	0.745478	1.57989
18	MCS	O	0.19098	0.495618	2.13918	5.96875	0.994319	2.42642
19	MCS		0.0927446	0.116441	0.111434	0.0571743	0.0503429	0.050155
20	MCS		2.23505	0.658171	0.639017	0.780948	1.35075	0.568346
21	MCS		1.28764	0.965138	2.70905	1.24501	1.31851	1.4865
22	MCS	O	0.898988	0.323924	0.676388	1.02896	0.224508	1.09735
23	MCS		0.0987947	0.104605	0.485335	0.152692	0.351264	0.131513
24	MCS		0.155899	0.369345	0.645336	0.307069	0.156996	0.300658
25	VS		0.299563	0.765631	0.156446	0.948584	1.22753	1.37598
26	VS		0.295824	0.887243	1.24719	1.58656	0.685234	1.01216
27	VS	O	0.582376	0.482152	0.734724	0.270212	0.414573	0.314369
28	VS	O	0.431904	1.25899	1.18193	1.19283	1.06059	3.09959
29	VS	O	0.451976	0.325821	0.245053	0.425921	1.20317	1.46377
30	VS		5.0927	3.97711	4.06008	4.23023	1.92059	18.1961
31	VS		0.258482	0.614289	1.72011	0.475925	0.170817	0.356786
32	VS		0.392973	0.239517	0.763455	1.28434	2.25458	1.20382
33	VS	O	1.25139	3.2044	4.70613	8.31603	2.08622	1.33535
34	VS	O	1.49908	0.523166	2.56171	3.41911	1.5999	2.80775
35	VS		0.113144	0.134439	0.224658	0.104482	0.180275	0.0821031
36	VS	O	0.241231	0.63739	0.638922	0.698258	1.62229	2.26148
37	VS	O	0.099547	0.311418	0.323115	0.285756	0.524644	0.132473
38	VS		1.25806	1.21528	4.6275	3.58968	3.14338	5.26698
39	VS		4.29114	3.79372	33.1572	3.97093	3.03468	21.7612
40	VS	O	0.154643	0.396975	1.09423	0.945279	0.564793	0.273721
41	VS		1.10486	4.05594	4.39986	9.21746	1.63558	4.94272
42	VS		0.818144	2.50986	0.769955	0.689394	1.48113	3.46408
43	VS		0.418786	0.700612	0.23898	0.715955	1.29385	1.76592
44	VS		3.40375	14.0734	5.30303	4.85857	2.39038	11.3404
45	VS		0.375651	0.251105	1.1601	1.05785	0.97187	0.674022
46	VS		0.587482	0.777862	6.28407	2.51857	0.904571	2.48735
47	VS		0.284155	0.143088	0.163892	0.279772	0.580327	0.388123
48	VS	O	0.393867	0.891046	1.49878	2.59383	0.538639	0.544883
49	VS		1.0139	1.36269	1.82464	2.62765	0.582921	1.33161
50	VS		1.61524	0.640898	1.20772	0.636295	1.5429	6.52198
51	VS		0.777556	0.807806	1.13096	4.7632	3.2003	2.12994
52	VS		0.111313	0.278172	0.677675	0.447601	0.0601425	0.15633
53	VS		1.83724	0.420938	1.34129	0.872574	4.80561	1.17619
54	VS		0.168191	0.194875	0.538336	1.13941	0.403202	0.564095
55	VS		0.136495	0.278766	1.7853	0.408297	0.215576	0.428086
56	VS		1.72113	1.85498	1.68464	2.85751	6.05834	5.49997
57	VS		0.0849932	0.136373	0.302445	0.312856	0.28784	0.877353
58	VS		1.46123	1.12205	2.84474	1.08297	3.64905	7.63538
59	VS		14.4243	2.26358	2.99324	1.87548	12.2274	29.2309
60	VS		0.582611	0.245688	0.261298	0.365743	0.646003	0.72732
61	VS		2.02069	2.34841	5.22982	5.68481	3.0724	5.07688
62	VS		0.380449	0.303203	0.393174	0.943374	0.382007	0.857994
63	VS		1.16047	0.44113	0.668986	0.791511	1.40269	2.12944
64	VS	O	0.211148	0.685614	2.35897	2.46709	0.514456	1.36176
65	VS		1.54103	4.37135	10.7316	2.72184	0.622097	0.995517
66	VS		0.573021	1.11437	0.840344	1.43096	1.01383	1.77801
67	VS		2.59972	2.62425	2.50331	4.43557	4.50771	7.49124
68	VS		0.708301	0.444721	0.661077	0.88993	0.799553	1.31912
69	VS		0.362069	1.10094	1.51307	3.60592	0.875565	1.01703
70	VS		0.277012	0.890711	3.6576	5.2696	3.57743	3.64609
71	VS		0.186149	0.265201	0.183898	0.261499	0.281692	0.203612
72	VS		0.0334441	0.230807	0.201468	0.184642	0.0728108	0.0209676
73	VS		0.0800825	0.21692	0.456797	0.305344	0.132247	0.0596403
74	VS		0.212688	0.299184	0.401671	0.635582	1.80183	2.18257
75	VS		0.224739	0.16194	0.937777	0.352382	0.13862	0.243871
76	VS		0.403322	0.388909	0.466307	0.133639	0.662882	0.634534
77	VS		1.47135	2.52305	8.61888	5.12647	2.97523	3.56895
78	VS	O	0.225747	0.342371	0.359787	0.357668	0.169497	0.227228
79	VS		0.149589	0.426957	0.404193	0.560491	0.225507	0.166782
80	VS		0.050548	0.401517	0.17495	0.601834	0.0821417	0.220676
81	VS		11.2314	3.42863	35.4412	13.9547	3.31127	2.07591
82	VS		1.69331	2.2543	1.21987	3.06392	2.45885	2.15888
83	VS		4.35901	8.71862	26.9231	10.6848	8.46515	4.76984
84	VS		0.836758	2.62237	6.68206	4.91407	1.25713	1.87792
85	VS		0.154094	0.292766	0.0542214	0.135254	0.509724	0.355392
86	VS	O	0.308342	0.996535	0.411751	0.962725	0.366188	0.497629
87	VS		0.146649	0.166972	0.191053	0.326528	0.160729	0.30327
88	VS		0.305776	1.76853	1.50063	5.53917	0.618061	0.610462
89	VS		0.0694102	0.156923	0.335175	0.7926	0.244527	0.307111
90	VS	O	0.257126	0.554122	0.982268	0.43359	0.350457	0.656467
91	VS		0.419347	2.17475	1.85836	5.91969	3.08365	5.42723
92	VS		0.391183	0.40625	0.73199	0.440299	1.91132	1.28365
93	VS		0.383313	0.615726	0.31686	0.496025	0.956097	0.642386
94	VS		2.65848	1.54904	7.56124	2.44381	3.01748	7.07778
95	VS		0.882144	0.286893	0.574441	1.72037	1.15962	0.87605
96	VS		0.527116	0.691412	1.57214	2.0494	1.13287	0.545207
97	VS		0.697665	0.545976	0.968664	2.85346	1.97762	2.98352
98	VS		3.87487	1.67216	3.18288	1.38154	8.48462	9.91019
99	VS		0.130967	0.154786	0.310132	0.209987	0.292017	0.378789
100	VS		0.252644	0.111909	0.36996	0.0869789	0.356157	0.150092
101	VS		1.02911	2.408	2.23188	5.28614	1.70069	2.29882
102	VS		0.345198	0.263827	0.33648	0.317099	1.07165	0.92606
103	VS		0.0477335	0.151303	0.199191	0.249167	0.0918844	0.115317
104	VS		0.686129	0.490022	1.69093	0.40457	0.862159	0.202886
O denotes the poor quality of coregistration.
1
1
1
1
1
1
1
1
1
1
1
1
1
1
1
1
1
1
1
1
1
1
1
1
1
1
1
1
1
1
1
1
1
1
1
1
1
1
1
1
1
1
1
1
1
1
1
1
1
1
1
1
1
1
1
1
1
1
1
1
1
1
1
1
1
1
1
1
1
1
1
1
1
1
1
1
1
1
1
1
1
1
1
1
1
1
1
1
1
1
1
1
1
1
1
1
1
1
1
1
1
1
1
